# Supplementary material for: Enhanced performance of perovskite solar cells by the incorporation of the luminescent small molecule DBP: perovskite absorption spectrum modification and interface engineering
Source: Royal Society of Chemistry journal article supplement (doi:10.1039/c9tc00064j), 2019-01-01
Supplement: c9tc00064j1.pdf [file c9tc00064j1.pdf]

## Supplement information

### Enhanced Performance of Perovskite Solar Cells by luminescent Small Molecule DBP: Perovskite Absorption Spectrum Modification and Interface Engineering

Saisai Ding<sup>a</sup>, Shiqi Li<sup>a</sup>, Qinjun Sun<sup>a</sup>, Yukun Wu<sup>a</sup>, Yifan Liu<sup>a</sup>, Yanxia Cui<sup>a</sup>, Hua Wang<sup>b</sup>, Yuying Hao<sup>a,b\*</sup>, Yucheng Wu<sup>b\*</sup>

*a College of Physics and Optoelectronics, Key Lab of Advanced Transducers and Intelligent Control System, Taiyuan University of Technology, Taiyuan 030024, China.*

*b Key Laboratory of Interface Science and Engineering in Advanced Materials, Taiyuan University of Technology, Taiyuan, 030024, China.*

*\*Corresponding author: [haoyuying@tyut.edu.cn](mailto:haoyuying@tyut.edu.cn), [wyc@tyut.edu.cn](mailto:wyc@tyut.edu.cn)*

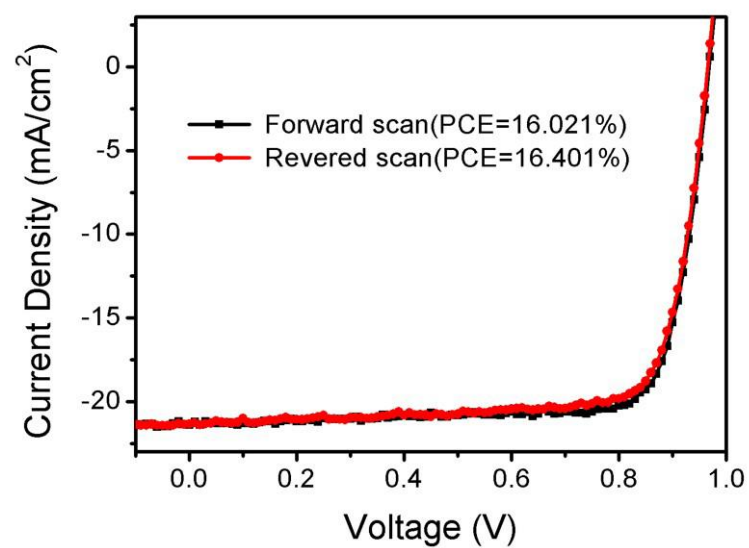

Figure S1 Forward and reverse scan  $J$ - $V$  curves of the PSCs made with optimized concentration DBP in DB

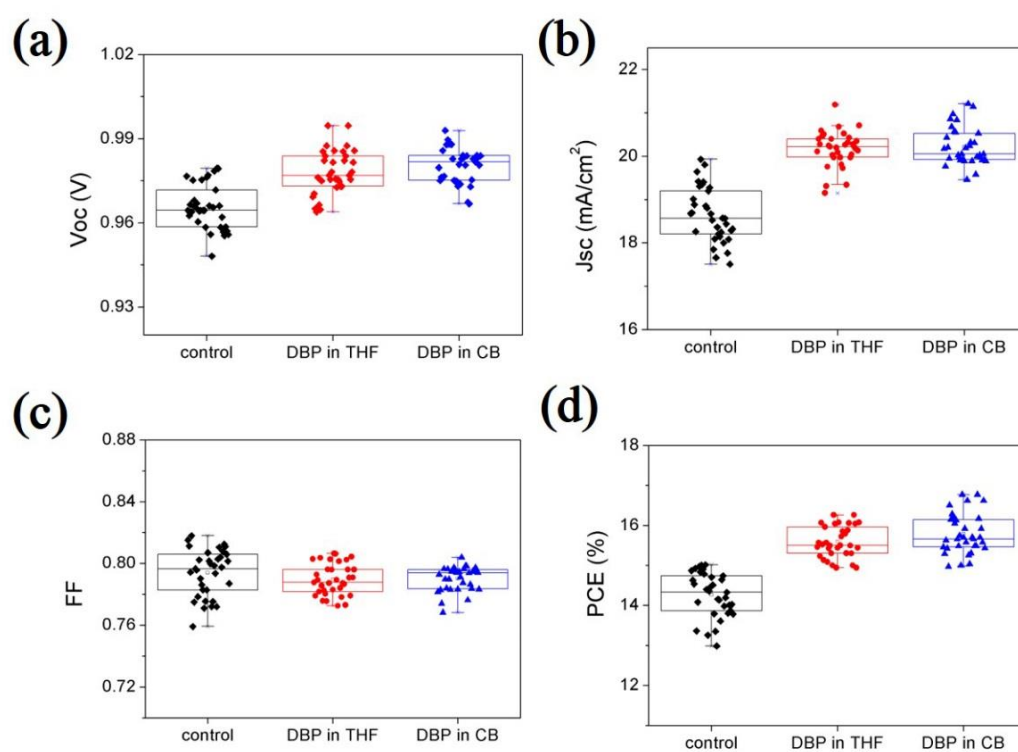

Figure S2 (a)  $V_{oc}$ , (b)  $J_{sc}$ , (c) FF and (d) PCE statistical distribution of PSCs without and with DBP based on thirty-six devices for each kind, respectively.

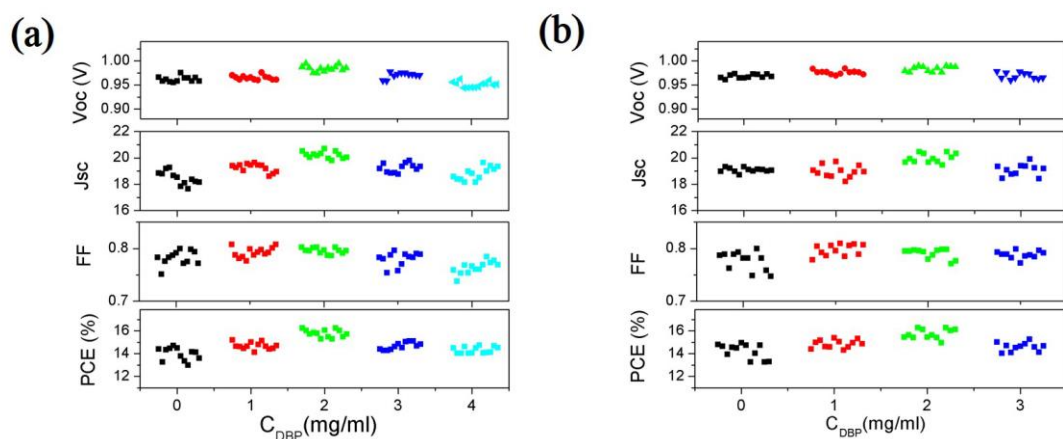

Figure S3 Photovoltaic parameter statistical distributions of PSCs plotted as a function of DBP concentrations ( $C_{\text{DBP}}$ ) in (a) THF and (b) CB solvents, the data points with the same colour correspond to the same DBP concentration

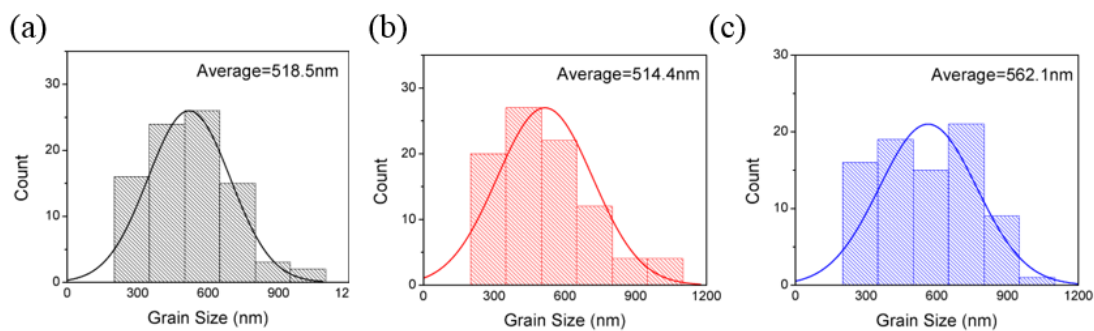

Figure S4 Histograms of crystal grain size distribution corresponding to the top-view SEM images of three films including perovskite, perovskite/DBP (in THF) and perovskite/DBP (in CB), as shown in Figure 2.

Table S1. Photovoltaic performance of reference and only solvent treatment PSCs under AM 1.5 G illumination (100 mW. cm<sup>-2</sup>). The data were obtained based on eighteen devices for each condition.

|           | Voc (V)      | Jsc (mA/cm <sup>2</sup> ) | FF            | PCE (%)      |
|-----------|--------------|---------------------------|---------------|--------------|
| Reference | 0.97 ± 0.008 | 18.64 ± 0.63              | 0.793 ± 0.022 | 14.26 ± 0.56 |
| THF       | 0.97 ± 0.006 | 18.92 ± 0.41              | 0.783 ± 0.033 | 14.33 ± 0.65 |
| CB        | 0.97 ± 0.008 | 18.69 ± 0.61              | 0.794 ± 0.015 | 14.41 ± 0.43 |

Table S2 PL delay lifetime with weight fractions fitted by a bi-exponential decay function

| Samples                 | $\tau_1$ /ns | A <sub>1</sub> (%) | $\tau_2$ /ns | A <sub>2</sub> (%) |
|-------------------------|--------------|--------------------|--------------|--------------------|
| perovskite              | 28.73        | 53.25              | 94.54        | 46.75              |
| perovskite/DBP (in THF) | 20.85        | 17.73              | 116.21       | 80.04              |
| perovskite/DBP (in CB)  | 17.82        | 9.36               | 121.54       | 88.16              |

Table S3 Fitting parameters of EIS data for the PSCs with and without DBP

|            | Rs (ohm·cm <sup>2</sup> ) | Rct (ohm·cm <sup>2</sup> ) | Rrec (ohm·cm <sup>2</sup> ) |
|------------|---------------------------|----------------------------|-----------------------------|
| None DBP   | 1.94×10 <sup>-8</sup>     | 130.5                      | 227.5                       |
| DBP in THF | 1.45×10 <sup>-8</sup>     | 61.5                       | 333.8                       |
| DBP in CB  | 1.74×10 <sup>-8</sup>     | 61.3                       | 348.2                       |

Table S4. the roughness and surface potential of three kinds of films including perovskite, perovskite/DBP (in THF), perovskite/DBP (in CB)

| Samples                 | Roughness (nm) | Surface potential (mV) |
|-------------------------|----------------|------------------------|
| perovskite              | 12.35          | 131.4                  |
| perovskite/DBP (in THF) | 12.51          | 232.3                  |
| perovskite/DBP (in CB)  | 12.37          | 297.5                  |
